# Supplementary material for: MM2S: personalized diagnosis of medulloblastoma patients and model systems
Source: PubMed Central journal article supplement (PMC4827218; doi:10.1186/s13029-016-0053-y), 2016-04-11

# MM2S CLASSIFIER DESIGN

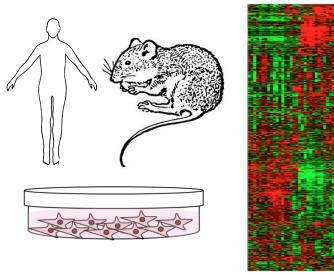

**Test Sample:**  
Normalized Gene  
Expression for  
MB mouse model,  
MB cell line,  
or MB patient

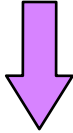

**ssGSEA**  
(694 GO-BP Genesets between Human & Test Sample)  
(geneset filtering: 20-100 genes)

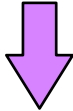

Select common genesets between  
Human & Test Sample after ssGSEA filtering

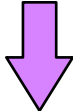

Generate an ssGSEA-ranking matrix  
(using 21 discriminative genesets per subtype)

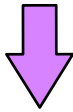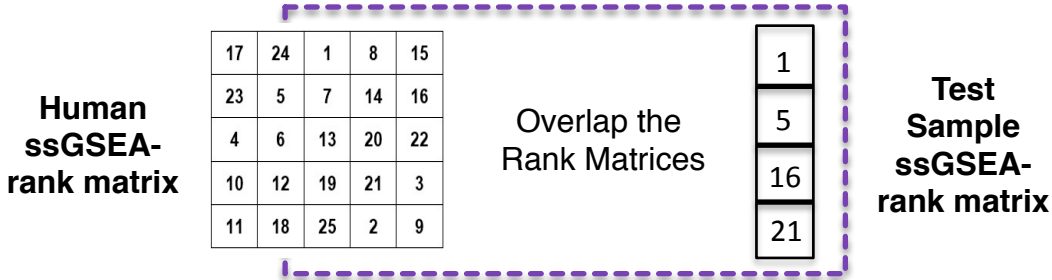

KNN  
classification  
(k=5)

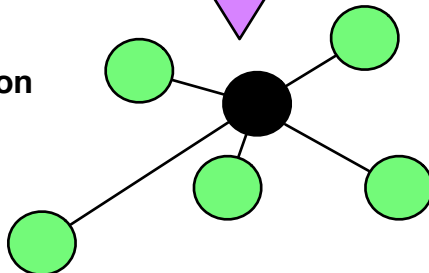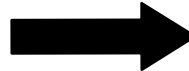

MM2S  
PREDICTIONS

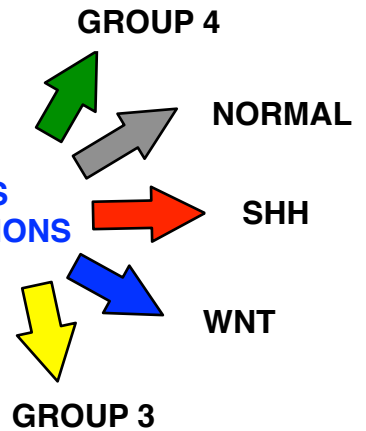

Supplement: 13029_2016_53_MOESM1_ESM.pdf [file 13029_2016_53_MOESM1_ESM.pdf]
